# Supplementary material for: Effect of home quarantine due to COVID19 pandemic on psychological status and behaviour of children 1½ to 5 years old. An online study
Source: Research Square preprint supplement (doi:10.21203/rs.3.rs-960859/v1), 2021-10-13
Supplement: Supplementary file 1 [file 7164964e7bb7ff7fa3867ca3.docx]

Table 1: sociodemographic characteristics of the children

| variable | category | number | percent |
| --- | --- | --- | --- |
| Age of children | **1.5- 2.9** | **91** | **45.5%** |
| **3- 5** | **109** | **54.5%** |
| **Total** | **200** | **100%** |
| **Mean of age** | **3.07** | |
| gender | **Male** | **98** | **49%** |
| **Female** | **102** | **51%** |
| **Total** | **200** | **100%** |
| Mothers’ education | **Elementary** | **2** | **1%** |
| **Intermediate& secondary** | **6** | **3%** |
| **College** | **173** | **86.5%** |
| **Higher education** | **19** | **9.5%** |
| **Total** | **200** | **100%** |

.

Table 2: dependent t test for the calculated score

| p- value | Sd | mean | N | variable |
| --- | --- | --- | --- | --- |
| 0.001 | 5.116 | 11.7 | 200 | **Before score** |
| 5.51 | 14.13 | 200 | **After score** |

**Table 3: the frequency of each question’s score before and after quarantine**

| Questions | Always or sometimes | | Never | |
| --- | --- | --- | --- | --- |
| Before quarantine% | After quarantine% | Before quarantine% | After quarantine% |
| 1- Aches or pains without medical cause | 14% | 18.5% | 86% | 81.5% |
| 2- Cannot concentrate and cannot pay attention for long time | 27.5% | 39% | 72% | 61% |
| 3- Get bored and angry quickly | 76.5% | 87% | 23% | 13% |
| 4- Cries a lot | 67.5% | 77.5% | 32% | 22.5% |
| 5- Does not play alone or without his parents | 78% | 84.5% | 22% | 15.5% |
| 6- Prefer to play alone and does not want to play with others | 17% | 18% | 83% | 82% |
| 7- Does not want to sleep alone or in his own private room | 73% | 84.5% | 27% | 15.5% |
| 8- Does not complete his meals nor enough quantity | 71% | 75% | 29% | 25% |
| 9- Eats a lot | 26% | 28.5% | 74% | 71.5% |
| 10- Stubborn, does not comply to his parents | 75% | 86.5% | 25% | 13.5% |
| 11- Gets easily scared from things like animals, people or places | **52.5%** | **49.5%** | **47.5%** | **50.5%** |
| 12- Clings to both or one of his parents | 85.5% | 87% | 14.5% | 13% |
| 13- Disturbed sleep or nightmares | 28.5% | 36% | 71..5% | 64% |
| 14- resentful , bad mood or angry most of the time | 52% | 66.5% | 48% | 33.5% |
| 15- Gets himself in constant fights with his peers | 34.5% | 44% | 65.5% | 56% |
| 16- Temper tantrum or clench his teeth | 33.5% | 45% | 66.5% | 55% |
| 17- Complains from diarrhoea, nausea or constipation without a medical reason | 12.5% | 14% | 87.5% | 86% |
| 18- Use phone or watch television for many hours | **53.5%** | **71%** | **46.5%** | **29%** |
| 19- Refuse to go out of the house or his room | 9.5% | 15.5% | 90.5% | 84.5% |
| 20- Destroy his own or others’ toys | 23% | 34% | 67% | 62% |
